# Latitude delineates patterns of biogeography in terrestrial *Streptomyces*

Mallory J Choudoir, James R Doroghazi, and Daniel H Buckley\*

School of Integrative Plant Sciences, Cornell University, Ithaca, NY 14853 USA

**\* Corresponding Author:** Daniel H Buckley  
[dbuckley@cornell.edu](mailto:dbuckley@cornell.edu)  
School of Integrative Plant Science  
Bradfield Hall 705, Cornell University, Ithaca, NY 14853  
607-255-1716

**Running Title:** Biogeography of *Streptomyces*

**Conflict of Interest:** None

# Summary

We examined the biogeography of *Streptomyces* at regional spatial scales to identify factors that govern patterns of microbial diversity within the genus. *Streptomyces* are spore forming filamentous bacteria which are widespread in soil and a major source of antibiotics. We applied population genetic approaches to analyze geographic and genetic population structure in six phylogroups of *Streptomyces* identified from a geographically explicit culture collection. *Streptomyces* strains were isolated from soils associated with perennial grass habitats sampled across a spatial scale of more than 6,000 km. We observed that *Streptomyces* population structure varies at regional spatial scales and that allelic diversity correlates with geographic distance. In addition, patterns of allelic diversity and gene flow are defined by latitude. Finally, we found that nucleotide diversity within phylogroups is negatively correlated with latitude. These results indicate that phylogroup diversification is constrained by dispersal limitation at regional spatial scales. We hypothesize that historical demographic processes have influenced the contemporary biogeography of *Streptomyces*.

# Introduction

Patterns of microbial biogeography have been widely documented (Whitaker *et al.*, 2003; Vos and Velicer, 2008; Bissett *et al.*, 2010; Martiny *et al.*, 2011; Gilbert *et al.*, 2012; Hatosy *et al.*, 2013), and yet we are only beginning to understand the evolutionary forces that generate and maintain these patterns. Explorations of biogeography are valuable because biogeographical patterns illustrate fundamental principles of evolution and ecology. Biogeographical patterns are ultimately governed by rates of dispersal and diversification (Martiny *et al.*, 2006; Hanson *et al.*, 2012). Since microbial dispersal cannot be observed directly, rates of dispersal are typically inferred from extant

patterns of genetic diversity. It has been hypothesized that microbes disperse ubiquitously due to their small cell size and massive population numbers (Finlay, 2002; Finlay and Fenchel, 2004). Yet endemism and dispersal limitation have been observed for a range of microbes (Cho and Tiedge, 2000; Green and Bohannan, 2006; Telford *et al.*, 2006; Boucher *et al.*, 2011), and microbial dispersal limitation has been verified experimentally (Bell, 2010). Evidence in the literature pertaining to microbial dispersal limitation, which initially appears to be contradictory, can be explained by at least two factors: first, dispersal constraints are likely to vary with respect to different species and habitats; and second, methods used to define microbial diversity vary dramatically in their taxonomic and phylogenetic resolution. Each of these factors has been discussed previously (Hanson *et al.*, 2012; Choudoir *et al.*, 2012), and we will only consider them briefly here.

Patterns of microbial dispersal and gene flow appear to differ between habitats and species. At one end of the spectrum, globally widespread microbes such as *Prochlorococcus* and *Pelagibacter* show little variation in gene content between the Atlantic and Pacific Oceans suggesting that dispersal can homogenize genetic diversity in pelagic systems (Coleman and Chisholm, 2010). At the other end of the spectrum are extremophiles such as *Sulfolobus* and thermophilic *Synechococcus*, which live in island-like volcanic habitats and exhibit strong patterns of allopatric divergence resulting from dispersal limitation (Papke *et al.*, 2003; Whitaker *et al.*, 2003; Cadillo-Quiroz *et al.*, 2012). Terrestrial microbes fall somewhere between these extremes. For example, soil dwelling microbes such as *Burkholderia pseudomallei*, *Burkholderia mallei*, and *Bacillus anthracis* exhibit biogeographical patterns governed by dispersal limitation at regional spatial scales (Kenefic *et al.*, 2009; Pearson *et al.*, 2009).

The phylogenetic resolution at which microbial diversity is defined can have a profound impact on our ability to discern patterns of microbial biogeography (as reviewed Hanson *et al.*, 2012). Surveys of SSU rRNA genes in terrestrial habitats indicate that environmental variables including temperature (Fierer *et al.*, 2009; Miller *et al.*, 2009), pH (Fierer and Jackson, 2006; Lauber *et al.*, 2009; Rousk *et al.*, 2010), and salinity (Lozupone and Knight, 2007) are more important than geographic distance or latitude in determining spatial patterns of microbial diversity. However, SSU rRNA gene sequences have an extremely low rate of nucleotide substitution (Ochman *et al.*, 1999), and microbes with similar or even identical SSU rRNA genes can have extensive genomic and ecological diversity (Welch *et al.*, 2002; Jaspers and Overmann, 2004). Thus, this marker has low sensitivity for detecting neutral processes that drive patterns of biogeography, such as dispersal limitation and genetic drift (Green and Bohannan, 2006; Hanson *et al.*, 2012). However, these neutral processes are readily explored using geographically and ecologically explicit culture collections characterized at high genetic resolution.

*Streptomyces* are ubiquitous across soil habitats, and many species are easily cultured, making this genus an excellent candidate for making a taxon-specific survey of biogeography. Furthermore, *Streptomyces* species have high rates of gene exchange both within and between species (Doroghazi and Buckley, 2010). Hence, this genus is an ideal model to explore dispersal limitations and gene flow in terrestrial systems. *Streptomyces* are gram-positive *Actinobacteria* (Kämpfer, 2006) known for their complex developmental cycle, which entails filamentous growth and the formation of desiccation resistant spores which are readily dispersed (Keiser *et al.*, 2000). *Streptomyces* play a significant role in the terrestrial carbon cycle (McCarthy and Williams, 1992;

Takasuka *et al.*, 2013), represent important agricultural pathogens (Loria *et al.*, 2006; Labeda, 2011), and are prolific producers of antibiotics (Watve *et al.*, 2001). Despite their importance, we lack an evolutionary framework to understand *Streptomyces* biogeography.

*Streptomyces* diversity varies spatially, though the influence of geographic distance and ecological variation remains poorly resolved. Ecological adaptation constrains the environmental distribution of *Streptomyces* and their genetic and phenotypic diversity can vary in relation to soil characteristics at small spatial scale (1 m– 60 m) in prairie soils (Davelos *et al.*, 2004a and 2004b), and in dune habitats (Antony-Babu *et al.*, 2008). There is also evidence for dispersal limitation at very large (continental) spatial scales with endemic species observed in North America and Central Asia (Wawrik *et al.*, 2007). Remarkably, genetic analysis of *Streptomyces pratensis* has revealed that strains of this species are in linkage equilibrium across a range that spans 1,000 km (Doroghazi and Buckley, 2010 and 2014). One interpretation of this finding is that *Streptomyces* are subject to widespread dispersal and unlimited gene flow at regional spatial scales. However, linkage equilibrium can also be observed for dispersal limited species that have undergone a recent demographic range expansion (Doroghazi and Buckley, 2010 and 2014). Demographic range expansion has previously been implicated as a factor that can explain ancestral patterns of gene exchange in *Streptomyces* clades (Andam *et al.*, 2016a). Combined, these data suggest a role for both adaptive and neutral processes in governing the diversity and biogeography of *Streptomyces*, but the evolutionary interpretation of these data depends on the degree to which dispersal limitation drives patterns of diversity in *Streptomyces*.

We evaluated *Streptomyces* biogeography to explore the ecological and evolutionary forces that govern diversification within this genus. The most powerful approach for detecting evolutionary patterns that result from dispersal limitation is to examine taxon-specific patterns of biogeography across ecologically similar sites. This approach controls for the effects of selection and provides a powerful test of neutral evolutionary processes (Hanson *et al.*, 2012). We constructed a taxon-specific isolate collection of *Streptomyces* found in ecologically similar grassland sites spanning the United States of America. In a study of *Streptomyces* species-level diversity, which evaluated polymorphism at a single locus (*rpoB*), we observed evidence for dispersal limitation manifesting in a latitudinal diversity gradient (Andam *et al.*, 2016b). The latitudinal diversity gradient is one of the earliest and most well documented patterns of biogeography (Wallace, 1878; Hillebrand, 2004), but it is essentially undocumented in terrestrial bacterial systems. The hypothesis of a latitudinal gradient in species diversity makes the prediction that latitudinal patterns of gene flow and genetic diversity should also vary *within* populations. Here we evaluate the hypothesis of a latitudinal diversity gradient in terrestrial *Streptomyces* by employing multilocus sequence analysis (MLSA) to characterize population-level patterns of gene flow and genetic diversity for six phylogroups of *Streptomyces* which are distributed widely across the United States.

## Results

### *Characterization of Streptomyces phylogroups*

We identified a total of 308 isolates representing the six targeted phylogroups, and these isolates spanned 13 sites (Table 1). Strains within phylogroups share 99.4-100% SSU rRNA gene sequence identity, and all strains share greater than 97% nucleotide identity in their SSU rRNA gene sequences (Figure S1). Strains within phylogroups also share 97.6%-99.5% average nucleotide

identity (ANI) across concatenated MLSA loci, and all strains share greater than 88% ANI (Figure 1, Table 2). Phylogroup genetic ancestry is congruent with boundaries defined by nucleotide cutoffs (Figure S2), and this indicates that these phylogroups approximate biological populations. We observed 122 unique MLSA haplotypes, with each phylogroup represented by 13-26 haplotypes (Figure 1, Table 2). Good's coverage for each of the six phylogroups ranges from 0.88-1.0 for individual loci and 0.94-1.0 for concatenated MLSA loci clustered at 99% nucleotide identity (Table S1). Hence, allelic diversity and nucleotide diversity are well sampled (Table S1), though unique haplotypes remain under sampled (Figure S3). The per site nucleotide diversity ( $\pi$ ) of each phylogroup ranges from 0.0026 to 0.011 (Table 2).

Four of the phylogroups do not match any *Streptomyces* species described in PubMLST (less than 97% ANI across MLSA loci, Figure S4A) (Jolley *et al.*, 2004). While the other two, phylogroups WA1063 and MS152 belong to the *S. griseus* species cluster (Rong and Huang, 2010). Isolates in phylogroup WA1063 share greater than 99% MLSA identity with *S. anulatus* and *S. praecox* and form a monophyletic clade with these type strains (Figure S4A). Isolates in phylogroup MS152 share greater than 98% MLSA identity with *S. mediolani*, *S. albovinaceus*, and *S. griseinus* and form a paraphyletic clade that includes these type strains (Figure S4A).

We find evidence of horizontal gene transfer consistent with previous observations of *Streptomyces* species (Doroghazi and Buckley, 2010; Andam *et al.*, 2016a). There is significant phylogenetic incongruence between MLSA loci (Figure S4, Table S2), suggesting that horizontal gene transfer has shaped the phylogeny of these groups. The six phylogroups exhibit evidence of population structure and admixture, with each phylogroup composed of  $3.2 \pm 0.8$  (mean  $\pm$  s.d.) subpopulations

(Figure 1). Evidence of admixture suggests horizontal gene transfer within phylogroups and is consistent with previous evidence of gene exchange in *Streptomyces* (Doroghazi and Buckley, 2010). Evidence of recombination within phylogroups MAN196, MS200, MS152, and F34 (PHI test,  $p < 0.05$ , Table 2) further supports the conclusion of gene exchange within populations. In addition, phylogroups WA1063 and MS152 share two identical *atpD* alleles (Figure S4B), but it is not clear whether these alleles are shared as a result of contemporary horizontal gene transfer or vertical inheritance from the most recent common ancestor of the two clades. The latter explanation is more parsimonious given the low level of polymorphism between the phylogroups WA1063 and MS152.

#### *Evidence for dispersal limitation*

Strains of the six phylogroups were obtained from soil samples from 13 sites of diverse geographic origin (Table 1). Each phylogroup was detected in  $4.2 \pm 0.4$  sites, and this distribution differs significantly from expectations for a random distribution of strains across sites (permutation test,  $p < 0.0005$ ), thereby rejecting the hypothesis of panmixia. Each phylogroup subpopulation was observed in  $2.2 \pm 0.9$  sites (mean  $\pm$  s.d.), and this value is lower than expected if subpopulations are randomly distributed across the sites occupied by each phylogroup (permutation test,  $p < 0.001$ ). These results indicate that phylogroup distribution is constrained geographically and that phylogroups have subpopulation structure that is also geographically explicit.

The geographic distribution of *Streptomyces* allelic diversity indicates dispersal limitation. Identical alleles are shared among phylogroup members across each phylogroup's geographic range, which can exceed 5,000 km (Figure 2, Table 1). However, dissimilarity in allele composition

increases with geographic distance, and this result is significant (Bray-Curtis dissimilarity, Mantel  $r = 0.29$ ,  $p = 0.005$ ) (Figure S5). Hence, alleles are more likely shared between geographically similar sites indicating dispersal limitation with potential for long range dispersal. This result is significant for all individual loci except *recA* (Bray-Curtis dissimilarity, *aptD* Mantel  $r = 0.31$ ,  $p = 0.004$ ; *gyrB*  $r = 0.22$ ,  $p = 0.031$ ; *recA*  $r = 0.16$ ,  $p = 0.088$ ; *rpoB*  $r = 0.27$ ,  $p = 0.004$ ; *trpB*  $r = 0.19$ ,  $p = 0.047$ ). In addition, all MLSA haplotypes (Figure 1, Figure 3) are unique to a single site, with the sole exception being a haplotype from phylogroup MS200 which is observed in both MS and WI (Sun Prairie).

Analysis of haplotype distribution is consistent with diversification due to dispersal limitation. Nested clade analysis (NCA) establishes significant phylogeographic inferences for phylogroups MAN196, MAN125, WA1063, and MS152 (Figure 3) but not for MS200 and F34. Nested clade phylogeographic inference postulates potential evolutionary and historical demographic processes that support extant patterns of diversity and biogeography. For instance, population subdivision of MAN125 across the Pacific Northwest (Figure 3A) and MAN196 between Maine and the Pacific Northwest (Figure 3B) is consistent with restricted gene flow due to historical long distance dispersal events. Likewise, population subdivision of MS152 and between the Southeast (MS and FL) and CA (Figure 3C) and WA1063 between WI (Brookfield) and OR (Figure 3D) is consistent with allopatric fragmentation.

### *Latitudinal diversity gradient*

The distribution and diversity of the phylogroups reveals a latitudinal diversity gradient. Strains from MAN125, MAN196, WA1063 occur mostly north of 40°N latitude, while strains from

MS200, MS152, F34 occur mostly south of this latitude (Table 1, Figure 2). This pattern of North/South partitioning is significant for each phylogroup when evaluated against the expectation of a random distribution across sites (permutation test,  $p < 0.01$  for each phylogroup after Bonferroni correction). Furthermore, partial Mantel tests were performed to evaluate the latitudinal and longitudinal vector components of geographic distance in relation to the allele composition of sites. There remains a significant relationship between allele composition and geographic distance when we control for longitude, (Mantel  $r = 0.23$ ,  $p = 0.022$ ), but this relationship is no longer significant when we control for latitude (Mantel  $r = 0.15$ ,  $p = 0.12$ ). This result indicates that allele composition changes more across latitude than it does across longitude. The latitudinal partitioning of alleles can be readily observed in the pattern of allele sharing between sites (Figure 2). Finally, we also observed a significant relationship between per site nucleotide diversity of phylogroup MLSA loci and the average latitude of sites in which they are found ( $R = -0.91$ ,  $p = 0.012$ ; Figure 4). This result indicates phylogroups recovered from lower latitudes have higher genetic diversity than those recovered from higher latitudes.

## Discussion

We used population genetic approaches to analyze spatial patterns of genetic diversity for six *Streptomyces* phylogroups isolated from geographically disparate but ecologically similar sites across the United States (Table 1). The distribution of phylogroups is nonrandom and dispersal limited (Figure S5) with phylogroups inhabiting geographic ranges defined by latitude (Table 1, Figure 2). In addition, the genetic diversity of phylogroups is inversely proportional to the latitude from which they were isolated (Figure 4). These findings suggest that there are latitudinal barriers

to dispersal, and that patterns of *Streptomyces* biogeography result from dispersal limitation and regional diversification due to genetic drift.

The phylogroups we describe are coherent phylogenetic groups that approximate biological populations (Figure S2). The members of each phylogroup share a distinguishable geographic range (Table 1, Figure 2), a recent common ancestor (Figure 1), and greater than 97% ANI across MLSA loci (Table 2). Despite geographic and genetic subpopulation structure (Figure 1), phylogroup members frequently share identical alleles across demes. It is worth noting that since all of the strains examined share > 97% SSU rRNA gene identity, these geographic patterns would not be detected through analysis of rRNA genes (Figure S1). We infer the presence of recombination within all phylogroups using both nucleotide polymorphism and phylogenetic methods (Table 2, Table S2).

Regional patterns of biogeography among phylogroups are consistent with limitations to dispersal and gene flow. Allopatric processes like genetic drift can drive diversification between populations that are geographically isolated. The geographic distribution of our phylogroups is nonrandom, and we find regional subpopulation structure within phylogroups (Figure 1, Figure 3). Although we find identical alleles in sites thousands of kilometers apart (Figure 2, Figure S4), MLSA haplotypes are not shared across sites (with the single exception of a haplotype shared between MS and WI) (Figure 3). We also observe a significant distance decay relationship for MLSA allele composition and geographic distance between sites (Figure S5). This data implies that while gene flow is moderate across the geographic range of a phylogroup, dispersal limitation and genetic drift create appreciable regional population structure.

*Streptomyces* phylogroup diversity is consistent with a latitudinal diversity gradient. We find that latitude is a significant predictor of gene flow (Figure 2). Furthermore, intra-phylogroup nucleotide diversity has a significant negative relationship with average latitude (Figure 4), which is congruous with the latitudinal diversity gradient observed for diverse macroorganisms (Hillebrand, 2004). There is conflicting evidence for latitudinal diversity gradients among microorganisms. Evidence for microbial latitudinal diversity gradients comes from marine systems (Fuhrman *et al.*, 2008; Sul *et al.*, 2013; Swan *et al.*, 2013), with contrary evidence obtained in terrestrial systems (Neufeld and Mohn, 2005; Chu *et al.*, 2010). However, most analyses of terrestrial bacterial biogeography are derived from analyses of SSU rRNA genes, and we show that analyses of SSU rRNA genes lack the sensitivity needed to detect the biogeographic patterns that we observe for *Streptomyces* (Figure S1).

Several hypotheses have been advanced to explain the formation of latitudinal diversity gradients (Wiens and Donoghue, 2004; Mittelbach *et al.*, 2007). Ecological hypotheses posit that factors such as carrying capacity, productivity, and niche availability vary across latitude and that these factors impose constraints on biodiversity (Currie *et al.*, 2004; Mouchet *et al.*, 2015). Evolutionary hypotheses invoke the positive relationship between temperature and the kinetics of metabolism to predict that evolutionary rates and cladogenesis correspond with temperature (Allen *et al.*, 2002). Historical hypotheses propose that the latitudinal diversity gradient is the product of historical geological, ecological, or demographic events that have influenced dispersal and diversification (Wiens and Donoghue, 2004; Stevens, 2006). For example, the influence of Pleistocene glacial events on the biogeography of diverse species of terrestrial and aquatic plants

and animals is well documented (Soltis *et al.*, 1997; Bernatch and Wilson, 1998; Conroy and Cook, 2000; Milá *et al.*, 2006; Maggs *et al.*, 2008; Wilson and Veraguth, 2010). There is also evidence that Pleistocene glaciation events have impacted both microbial communities (Eisenlord *et al.*, 2012) and populations (Kenefic *et al.*, 2009; Mikheyev *et al.*, 2008).

The biogeography of our *Streptomyces* phylogroups is consistent with historical demography and dispersal limitation resulting in a contemporary latitudinal diversity gradient. For instance, MAN125 is nearly in linkage equilibrium ( $I_A = 0.09$ ) though its members span a geographic range of over 2,000 km across the Pacific Northwest. Similar patterns of recombination have also been observed in a *S. pratensis* population which spanned 1,000 km across sites present in North Carolina and northern New York (Doroghazi and Buckley, 2010 and 2014). The observation of linkage equilibrium indicates that either the population lacks contemporary barriers to gene flow or the population has experienced a recent demographic expansion. Coupled with evidence of limitations to gene flow at regional scales (Figure 2, Figure S5), the most parsimonious explanation for these conflicting observations is a recent demographic range expansion. Conversely, latitudinal gradients in marine bacterial diversity have been attributed to the increased kinetics of metabolism which increase the evolutionary tempo in tropical latitudes (Fuhrman *et al.*, 2008). Since latitude is correlated with temperature, we cannot dismiss the influence of kinetics as a cause of the latitudinal diversity gradient in terrestrial *Streptomyces*. Furthermore, it is possible that unappreciated ecological variables, such as the species composition of perennial grass communities, could shape the diversity gradient. Ultimately, it is likely that latitudinal diversity gradients can arise from a combination of ecological, evolutionary, and historical processes that vary in their relative influence with respect to different species and different habitats.

Evidence for a latitudinal diversity gradient coupled with evidence of demographic range expansion, while not conclusive, is consistent with predictions of phylogenetic niche conservatism (Wiens and Donoghue, 2004; Stevens, 2006) which posits that these biogeographical patterns result from the historical effects of changes in paleoclimate (Hewitt *et al.*, 1996, 2000, and 2004). The genetic consequences of glaciation events are described in depth by Hewitt (1996, 2000, and 2004), and the population structure we observe in our *Streptomyces* phylogroups is consistent with post-glacial demographic range expansion. One of the expectations of post-glacial expansion is “southern richness versus northern purity” (Hewitt, 2004). This is evident in the negative correlation we observe between latitude and the nucleotide diversity of phylogroups (Figure 4). Williams *et al.* (1998) justifies 40°N latitude as approximating late Pleistocene glacial and non-glacial regions with respect to species distributions in North America. Hence, the latitudinal delineation of allele distributions for *Streptomyces* phylogroups roughly corresponds to the extent of ice coverage during the late Pleistocene (Figure 2), which suggests historical population expansion from lower to higher latitudes.

Haplotype distributions of phylogroups MAN125, MAN196, WA1063, and MS152 are consistent with allopatric diversification resulting from dispersal limitation (Figure 3). Haplotype nested clade analysis (NCA) predicts that historical dispersal events and range expansion across northern regions resulted in limits on dispersal during intermediate timescales, allowing genetic drift to create the phylogroup population structures observed today. There is moderate criticism of NCA (Knowles and Maddison, 2002; Nielsen and Beumont, 2009) due to the subjective nature of inferring historical processes and the wide potential for stochastic processes creating similar

patterns of biogeography. Yet these tools can provide useful hypotheses. Northern phylogroups MAN125 and MAN196 share a common ancestor with southern phylogroups MS200 and F34 (Figure 1). The contemporary population structure of MAN125 and MAN196 is consistent with a historical range expansion from a common ancestor shared by both clades (Figure 1, Figure 3). Further population structure within each phylogroup likely resulted from barriers to gene flow and historical dispersal events across the Pacific Northwest for MAN125 (Figure 3A) and between Maine and the Pacific Northwest for MAN196 (Figure 3B). Analysis of haplotype distribution within WA1063 and MS152 is also consistent with diversification of populations as a result of gene flow limitation between the Midwest and Pacific Northwest for WA1063 (Figure 3D) and between the Southeast and West for MS152 (Figure 3C).

Phylogroups WA1063 and MS152 share a recent common ancestor (Figure 1, Figure S2) and also share two identical alleles at the *atpD* locus (Figure S4B). These phylogroups have distinct, non-overlapping geographic ranges with WA1063 found in higher latitudes and MS152 in lower latitudes (Table 1, Figure 2). WA1063 and MS152 have 0.0205 net nucleotide substitutions per site across concatenated MLSA loci. We evaluate the possible time range for divergence between WA1063 and MS152 by extrapolating very roughly from the nucleotide substitution rate ( $\mu = 4.5 \times 10^{-9}$ ) and generation time (100-300 generations per year) for *E. coli* (Ochman *et al.*, 1999), since corresponding values are not available for *Streptomyces* or their relatives. Based upon these gross approximations, we would estimate that WA1063 and MS152 diverged 15,000-50,000 years ago, corresponding to events in the late Pleistocene (Clayton *et al.*, 2006). Hence, it is likely that the identical *atpD* alleles found in both WA1063 and MS152 were inherited from a shared ancestral population (Figure S3B) as opposed to inheritance from contemporary gene exchange.

Through population genetic analysis of six *Streptomyces* phylogroups, we find evidence for dispersal limitation associated with geographically explicit patterns of gene flow which manifest in a latitudinal gradient of nucleotide diversity. Furthermore, these data support the hypothesis that historical demographic processes influence the contemporary biogeography of *Streptomyces*. Due to their spore forming capabilities and potential for long range dispersal, *Streptomyces* are an ideal system for assessing limits on gene flow among terrestrial bacteria. Future research should seek to determine the degree to which dispersal limitation is due to limits on spore mobility, density dependent blocking, or a result of adaptive constraints. A better understanding of *Streptomyces* biogeography and the evolutionary forces that govern *Streptomyces* diversification may ultimately assist in the discovery of novel genetic diversity and possibly novel antibiotics within this genus.

## Experimental Procedures

### *Strain isolation and DNA extraction*

We assembled a culture collection of more than 1,000 *Streptomyces* from 15 sites across the United States with soil sampled at 0-5 cm depth (Andam *et al.*, 2016b). Sites were selected to represent a narrow range of ecological characteristics including meadow, pasture, or native grasslands dominated by perennial grasses and having moderately acidic soil (pH:  $6.0 \pm 1.0$ ; ave.  $\pm$  s.d.). Strains were isolated using uniform conditions and this will select for strains having similar physiological characteristics. The analysis of physiologically similar strains from ecologically similar sites improves our ability to detect biogeographical patterns that result from drift by minimizing the importance of selection (as reviewed by Hanson *et al.*, 2012). Soil was air dried, and *Streptomyces* strains were isolated on glycerol-arginine agar plates of pH 8.7 containing

cycloheximide and Rose Bengal (El-Nakeeb and Lechevalier, 1963; Ottow, 1972) as previously described (Doroghazi and Buckley, 2010). Genomic DNA was extracted for each isolate from purified cultures, which were grown by shaking at 30°C in liquid yeast extract-malt extract medium (YEME) containing 0.5% glycine (Kieser *et al.*, 2000), by using a standard phenol/chloroform/isoamyl alcohol protocol (Roberts and Crawford, 2000).

The gene encoding the RNA polymerase beta-subunit (*rpoB*) provides a robust, advantageous alternative to the SSU rRNA locus for phylogenetic analyses of the genera *Streptomyces* (Kim *et al.*, 2004). We previously assessed genetic diversity of our culture collection using partial *rpoB* sequences clustered at 0.01 patristic distances with RAMI (Pommier *et al.*, 2009), and using this approach we identified 107 species-like phylogenetic clusters, or phylogroups (Andam *et al.*, 2016b). We selected six of these phylogroups that represented the geographic and phylogenetic diversity of our culture collection for further analysis. MLSA was performed on 17-47 isolates from each phylogroup. Phylogroup names are capitalized and based on a representative isolate; for example, phylogroup WA1063 is named for *Streptomyces* sp. wa1063. Isolates are identified with a lowercase letter code indicating site of origin followed by a strain number; for example, isolate wa1063 is strain 1063 isolated from Washington (WA) state.

#### *Multilocus sequence analysis (MLSA)*

We adapted the MLSA scheme developed for *Streptomyces* by Guo *et al.* (2008), which targets the five housekeeping loci *atpD*, *gyrB*, *recA*, *rpoB*, and *trpB* as described in Doroghazi and Buckley (2010). The V2 and V2 regions of SSU rRNA sequences were amplified using the universal primer 8F: AGAGTTTGATCCTGGCTCAG. Reactions for Sanger sequencing were performed using

forward primers for all loci except *rpoB*, for which the reverse primer was used. Trace files were uniformly screened using CAP3 (Huang and Madan, 1999) interfaced with a Perl script. Sequences were aligned using MUSCLE (Edgar, 2004), trimmed to 431 bp, 415 bp, 446 bp, 557 bp, and 489 bp, for genes *atpD*, *gyrB*, *recA*, *rpoB*, *trpB*, respectively, and concatenated consistent with the genomic order in *Streptomyces coelicolor* A3(2). SSU rRNA sequences were trimmed to 357 bp, creating an alignment spanning the V1 and V2 regions. Gene sequences are available on GenBank with accession numbers XXXX-XXXX.

Good's coverage estimation and haplotype rarefaction was determined using mothur (Schloss *et al.*, 2009). DNA polymorphism statistics including: number of segregating sites, nucleotide diversity, and Tajima's D, were determined with DnaSP v5 (Librado and Rozas, 2009) and LDhat (McVean *et al.*, 2002). Population scaled mutation rates (Watterson's theta;  $\theta_w = 2N_e\mu$ ), recombination or gene conversion rates ( $\rho = 2N_e r/2$ ), and relative rates of recombination ( $\rho/\theta_w$ ) were estimated using LDhat (McVean *et al.*, 2002) and are expressed per nucleotide site. The standard index of association ( $I_A$ ) was calculated from allelic data with LIAN v3.5 (Haubold and Hudson, 2000) using the Monte-Carlo test and 100 iterations. The pairwise homoplasy index (PHI) statistic was determined using PhiPack (Bruen *et al.*, 2006), and statistical significance was evaluated under a null hypothesis of no recombination. Sequence identity across phylogroups was calculated with mothur (Schloss *et al.*, 2009)

### *Phylogeny reconstruction*

Maximum likelihood (ML) trees were constructed from the nucleotide sequences of individual and concatenated MLSA loci using the generalized time reversible nucleotide substitution model

(Tavaré, 1986) with gamma distributed rate heterogeneity among sites (GTRGAMMA) supported in RAxML v7.3.0 (Stamatakis, 2006). Bootstrap support was determined for the highest-scoring ML tree of 20 iterations, and the number of bootstrap replicates was determined using the extended majority rule (autoMRE) convergence criteria (Pattengale *et al.*, 2010). Root placement is defined by *Mycobacterium smegmatis*. Significant phylogenetic incongruence between loci was determined using the Shimodaira-Hasegawa test (Shimodaira and Hasegawa, 1999) implemented in the R package phangorn (Schliep, 2011).

### *Population structure*

Concatenated MLSA sequences were analyzed using Structure v2.3.3 (Pritchard *et al.*, 2000) to examine population affiliation, subdivision, and admixture within and between phylogroups. Structure was run using an admixture model with a burn-in length of  $1.0E^6$  and  $3.0E^6$  replicates. The most probable number of sub-populations (k) was evaluated with 10 independent runs and chosen using the Evanno method (Evanno *et al.*, 2005), with k = 1 through k = 6 within phylogroups and through k = 8 between phylogroups, implemented by Structure Harvester (Earl and vonHoldt, 2012). After choosing the most probable k-value, the program Clumpp was used to permute outputs of the independent runs (Jakobsson and Rosenberg, 2007).

### *Patterns of dispersal and gene flow*

We used permutation tests to evaluate whether phylogroup distribution across sites could be explained by panmixia. We compared the observed distributions to those expected under a random distribution model using 1,000 permutations to assess significance. In addition, correlations between geographic distance and allele composition between sites were assessed using Mantel and

partial Mantel tests (Mantel, 1967; Smouse *et al.*, 1986). These tests were performed with the R package *ecodist* (Goslee and Urban, 2007) using the Pearson correlation method and 1,000 permutations. Bray-Curtis dissimilarity was calculated from unique allele composition across sites.

Haplotype networks were created using a statistical parsimony procedure (Templeton *et al.*, 1987; Templeton *et al.*, 1995) implemented in TCS v1.18 (Clement *et al.*, 2000). Nested clade information was used to infer processes that could explain the geographic and genetic distribution of sequences using the program GeoDis v2.2 (Posada *et al.*, 2000). Both TCS v1.18 and GeoDis v2.2 were performed in ANeCA (Panchal, 2007).

## Acknowledgements

This material is based upon work supported by the National Science Foundation under Grants No. DEB-1050475 and DEB-1456821. We would like to thank Ashley Campbell for her help in generating MLSA sequences.

## References

- Allen AP, Brown JH, Gillooly JF. (2002) Global biodiversity, biochemical kinetics, and the energetic-equivalence rule. *Science* **297**: 1545–1548.
- Andam CP, Choudoir MJ, Nguyen AVT, Park HS, Buckley DH. (2016a) Contributions of ancestral inter-species recombination to the genetic diversity of extant *Streptomyces* lineages. ISMEJ In Press. doi: 10.1038/ismej.2015.230.

436 Andam CP, Doroghazi JR, Campbell AN, Kelly PJ, Choudoir MJ, Buckley DH. (2016b). A  
 437 latitudinal diversity gradient in terrestrial bacteria of the genus *Streptomyces*. mBio In Press.  
 438

439 Antony-Babu S, Stach JEM, Goodfellow M. (2008) Genetic and phenotypic evidence for  
 440 *Streptomyces griseus* ecovars isolated from a beach and dune sand system. Antonie Van  
 441 Leeuwenhoek **94**: 63–74.  
 442

443 Bell T. (2010) Experimental tests of the bacterial distance-decay relationship. ISME J **4**: 1357–  
 444 1365.  
 445

446 Bernatchez L, Wilson CC. (1998) Comparative phylogeography of Nearctic and Palearctic  
 447 fishes. Mol Ecol **7**: 431–452.  
 448

449 Bissett A, Richardson AE, Baker G, Wakelin S, Thrall PH. (2010) Life history determines  
 450 biogeographical patterns of soil bacterial communities over multiple spatial scales. Mol Ecol **19**:  
 451 4315–4327.  
 452

453 Boucher Y, Cordero OX, Takemura A, Hunt DE, Schliep K, Baptiste E, *et al.* (2011) Local  
 454 mobile gene pools rapidly cross species boundaries to create endemism within global *Vibrio*  
 455 *cholerae* populations. mBio **2**: e00335–10.  
 456

457 Bruen TC, Philippe H, Bryant D. (2005) A simple and robust statistical test for detecting the  
 458 presence of recombination. Genetics **172**: 2665–2681.

459

460 Cadillo-Quiroz H, Didelot X, Held NL, Herrera A, Darling A, Reno ML, *et al.* (2012) Patterns of

461 gene flow define species of thermophilic Archaea. PLoS Biol **10**: e1001265.

462

463 Cho J, Tiedje JM. (2000) Biogeography and degree of endemism of fluorescent *Pseudomonas*

464 strains in soil. Appl Environ Microbiol **66**: 5448-5456.

465

466 Choudoir MJ, Campbell AN, Buckley DH. (2012) Grappling with Proteus: population level

467 approaches to understanding microbial diversity. Front Microbiol **3**: 336.

468

469 Chu H, Fierer N, Lauber CL, Caporaso JG, Knight R, Grogan P. (2010) Soil bacterial diversity in

470 the Arctic is not fundamentally different from that found in other biomes. Environ Microbiol **12**:

471 2998–3006.

472

473 Clayton L, Attig JW, Mickelson DM, Johnson MD, Syverson KM. (2006) Glaciation of

474 Wisconsin: Wisconsin Geological and Natural History Survey Educational Series 36. Wisconsin

475 Geological and Natural History Survey. Madison, WI.

476

477 Clement M, Posada D, Crandall KA. (2000) TCS: A computer program to estimate gene

478 genealogies. Mol Ecol **9**: 1657–1659.

479

480 Coleman ML, Chisholm SW. (2010) Ecosystem-specific selection pressures revealed through

481 comparative population genomics. Proc Natl Acad Sci U S A **107**: 18634–18639.

482

483 Conroy CJ, Cook JA. (2000) Phylogeography of a post-glacial colonizer: *Microtus longicaudus*

484 (Rodentia: Muridae). Mol Ecol **9**: 165–175.

485

486 Currie DJ, Mittelbach GG, Cornell HV, Field R, Guégan JF, Hawkins BA, *et al.* (2004)

487 Predictions and tests of climate-based hypotheses of broad-scale variation in taxonomic richness.

488 Ecol Lett **7**: 1121–1134.

489

490 Davelos AL, Xiao K, Samac DA, Martin AP, Kinkel LL. (2004a) Spatial variation in

491 *Streptomyces* genetic composition and diversity in a prairie soil. Microb Ecol **48**: 601–612.

492

493 Davelos AL, Kinkel LL, Samac DA. (2004b) Spatial variation in frequency and intensity of

494 antibiotic interactions among *Streptomyces* from prairie soil. Appl Environ Microbiol **70**:

495 1051–1058.

496

497 Doroghazi JR, Buckley DH. (2014) Intraspecies comparison of *Streptomyces pratensis* genomes

498 reveals high levels of recombination and gene conservation between strains of disparate

499 geographic origin. BMC Genomics **15**: 970.

500

501 Doroghazi JR, Buckley DH. (2010) Widespread homologous recombination within and between

502 *Streptomyces* species. ISME J **4**: 1136–1143.

503

Earl DA, vonHoldt BM. (2012) STRUCTURE HARVESTER: a website and program for visualizing STRUCTURE output and implementing the Evanno method. *Conserv Genet Resour* **4**: 359–361.

Edgar RC. (2004) MUSCLE: multiple sequence alignment with high accuracy and high throughput. *Nucleic Acid Res* **32**: 1792–1797.

Eisenlord SD, Zak DR, Upchurch RA. (2012) Dispersal limitation and the assembly of soil *Actinobacteria* communities in a long-term chronosequence. *Ecol Evol* **2**: 538–549.

El-Nakeeb MA, Lechevalier HA. (1963) Selective isolation of aerobic Actinomycetes. *Appl Microbiol* **11**: 75–77.

Evanno G, Regnaut S, Goudet J. (2005) Detecting the number of clusters of individuals using the software STRUCTURE: a simulation study. *Mol Ecol* **14**: 2611–2620.

Fierer N, Carney KM, Horner-Devine MC, Megonigal JP. (2009) The biogeography of ammonia-oxidizing bacterial communities in soil. *Microb Ecol* **58**: 435–445.

Fierer N, Jackson RB. (2006) The diversity and biogeography of soil bacterial communities. *Proc Natl Acad Sci U S A* **103**: 626–631.

526 Finlay BJ. (2002) Global dispersal of free-living microbial eukaryote species. *Science* **296**:  
527 1061–1063.  
528  
529 Finlay BJ, Fenchel T. (2004) Cosmopolitan metapopulations of free-living microbial eukaryotes.  
530 *Protist* **155**: 237–244.  
531  
532 Fuhrman JA, Steele JA, Hewson I, Schwalbach MS, Brown M V, Green JL, *et al.* (2008) A  
533 latitudinal diversity gradient in planktonic marine bacteria. *Proc Natl Acad Sci U S A* **105**: 7774–  
534 7778.  
535  
536 Gilbert JA, Steele JA, Caporaso JG, Steinbrück L, Reeder J, Temperton B, *et al.* (2012) Defining  
537 seasonal marine microbial community dynamics. *ISME J* **6**: 298–308.  
538  
539 Goslee SC, Urban DL. (2007) The ecodist package for dissimilarity-based analysis of ecological  
540 data. *J Stat Softw* **22**: 1–19.  
541  
542 Green J, Bohannan BJM. (2006) Spatial scaling of microbial biodiversity. *Trends Ecol Evol* **21**:  
543 501–507.  
544  
545 Guo Y, Zheng W, Rong X, Huang Y. (2008) A multilocus phylogeny of the *Streptomyces*  
546 *griseus* 16S rRNA gene clade: use of multilocus sequence analysis for streptomycete  
547 systematics. *Int J Syst Evol Microbiol* **58**: 149–159.  
548

549 Hanson CA, Fuhrman JA, Horner-Devine MC, Martiny JBH. (2012) Beyond biogeographic  
550 patterns: processes shaping the microbial landscape. *Nat Rev Microbiol* **10**: 497–506.  
551

552 Hatosy SM, Martiny JBH, Sachdeva R, Steele J, Fuhrman JA, Martiny AC. (2013) Beta diversity  
553 of marine bacteria depends on temporal scale. *Ecology* **94**: 1898–1904.  
554

555 Haubold B, Hudson RR. (2000) LIAN 3.0: detecting linkage disequilibrium in multilocus data.  
556 *Bioinformatics* **16**: 847–848.  
557

558 Hewitt GM. (1996) Some genetic consequences of ice ages, and their role in divergence and  
559 speciation. *Biol J Linnean Soc* **58**: 247–276.  
560

561 Hewitt G. (2000) The genetic legacy of the Quaternary ice ages. *Nature* **405**: 907–913.  
562

563 Hewitt GM. (2004) Genetic consequences of climatic oscillations in the Quaternary. *Philos Trans*  
564 *R Soc Lond B Biol Sci* **359**: 183–195.  
565

566 Hillebrand H. (2014) On the generality of the latitudinal diversity gradient. *Amer Nat* **163**: 192–  
567 211.  
568

569 Huang X, Madan A. (1999) CAP3: a DNA sequence assembly program. *Genome Res* **9**: 868–  
570 677.  
571

Jakobsson M, Rosenberg NA. (2007) CLUMPP: a cluster matching and permutation program for dealing with label switching and multimodality in analysis of population structure. *Bioinformatics* **23**: 1801–1806.

Jaspers E, Overmann J. (2004) Ecological significance of microdiversity: identical 16S rRNA gene sequences can be found in bacteria with highly divergent genomes and ecophysologies. *Appl Environ Microbiol* **70**: 4831–4839.

Jolley KA, Chan MS, Maiden MCJ. (2004) mlstdbNet - distributed multi-locus sequence typing (MLST) databases. *BMC Bioinformatics* **5**: 86.

Kämpfer P. (2006) The family *Streptomycetaceae* Part I: Taxonomy. In: *The Prokaryotes*, Volume 3. Dworkin, M, Falkow, S, Rosenberg, E, Schliefer, K, & Stackebrandt, E. (eds). New York: Springer, pp. 538–604.

Kenefic LJ, Pearson T, Okinaka RT, Schupp JM, Wagner DM, Hoffmaster AR, *et al.* (2009) Pre-Columbian origins for North American anthrax. *PLoS One* **4**: e4813.

Kieser T, Bibb M, Buttner M, Charter K, Hopwood D. (2000) *Practical Streptomyces Genetics*. Norwich, UK: John Innes Foundation.

Kim BJ, Kim CJ, Chun J, Koh YH, Lee SH, Hyun JW, *et al.* (2004) Phylogenetic analysis of the genera *Streptomyces* and *Kitasatospora* based on partial RNA polymerase beta-subunit gene (*rpoB*) sequences. *Int J Syst Evol Microbiol*. **54**: 593–598.

Knowles L, Maddison W. (2002) Statistical phylogeography. *Mol Ecol* **11**: 2623–2635.

Labeda DP. (2011) Multilocus sequence analysis of phytopathogenic species of the genus *Streptomyces*. *Int J Syst Evol Microbiol* **61**: 2525–2531.

Lauber CL, Hamady M, Knight R, Fierer N. (2009) Pyrosequencing-based assessment of soil pH as a predictor of soil bacterial community structure at the continental scale. *Appl Environ Microbiol* **75**: 5111–5120.

Librado P, Rozas J. (2009) DnaSP v5: a software for comprehensive analysis of DNA polymorphism data. *Bioinformatics* **25**: 1451–1452.

Loria R, Kers J, Joshi M. (2006) Evolution of plant pathogenicity in *Streptomyces*. *Annu Rev Phytopathol* **44**: 469–487.

Lozupone CA, Knight R. (2007) Global patterns in bacterial diversity. *Proc Natl Acad Sci U S A* **104**: 11436–11440.

615 Maggs CA, Castilho R, Foltz D, Henzler C, Jolly MT, Kelly J, *et al.* (2008) Evaluating  
616 signatures of glacial refugia for North Atlantic benthic marine taxa. *Ecology* **89**: S108–S122.  
617

618 Mantel N. (1967) The detection of disease clustering and a generalized regression approach.  
619 *Cancer Research* **27**: 209–220.  
620

621 Martiny JBH, Bohannan BJM, Brown JH, Colwell RK, Fuhrman JA, Green JL, *et al.* (2006)  
622 Microbial biogeography: putting microorganisms on the map. *Nat Rev Microbiol* **4**: 102–112.  
623

624 Martiny JBH, Eisen JA, Penn K, Allison SD, Horner-Devine MC. (2011) Drivers of bacterial  $\beta$  -  
625 diversity depend on spatial scale. *Proc Natl Acad Sci U S A* **108**: 7850–7854.  
626

627 McCarthy AJ, Williams ST. (1992) Actinomycetes as agents of biodegradation in the  
628 environment - a review. *Gene* **115**: 189–192.  
629

630 McVean G, Awadalla P, Fearnhead P. (2002) A coalescent-based method for detecting and  
631 estimating recombination from gene sequences. *Genetics* **160**: 1231–1241.  
632

633 Mikheyev AS, Vo T, Mueller UG. (2008) Phylogeography of post-Pleistocene population  
634 expansion in a fungus-gardening ant and its microbial mutualists. *Mol Ecol* **17**: 4480–4488.  
635

636 Mila B, Smith T, Wayne R. (2006) Postglacial population expansion drives the evolution of  
637 long-distance migration in a songbird. *Evolution* **60**: 2403–2409.

638

639 Miller SR, Strong AL, Jones KL, Ungerer MC. (2009) Bar-coded pyrosequencing reveals shared  
640 bacterial community properties along the temperature gradients of two alkaline hot springs in  
641 Yellowstone National Park. *Appl Environ Microbiol* **75**: 4565–4572.

642

643 Mittelbach GG, Schemske DW, Cornell H V., Allen AP, Brown JM, Bush MB, *et al.* (2007)  
644 Evolution and the latitudinal diversity gradient: speciation, extinction and biogeography. *Ecol*  
645 *Lett* **10**: 315–331.

646

647 Mouchet M, Levers C, Zupan L, Kuemmerle T, Plutzar C, Erb K, *et al.* (2015) Testing the  
648 effectiveness of environmental variables to explain European terrestrial vertebrate species  
649 richness across biogeographical scales. *PLoS One* **10**: e0131924.

650

651 Neufeld JD, Mohn WW. (2005) Unexpectedly high bacterial diversity in arctic tundra relative to  
652 boreal forest soils, revealed by serial analysis of ribosomal sequence tags. *Appl Environ*  
653 *Microbiol* **71**: 5710–5718.

654

655 Nielsen R, Beaumont MA. (2009) Statistical inferences in phylogeography. *Mol Ecol* **18**: 1034–  
656 1047.

657

658 Ochman H, Elwyn S, Moran NA. (1999) Calibrating bacterial evolution. *Proc Natl Acad Sci U S*  
659 *A* **96**: 12638–12643.

660

- Ottow JCG. (2013) Rose bengal as a selective aid in the isolation of fungi and Actinomycetes from natural sources. *Mycologia* **64**: 304–315.
- Panchal M. (2006) The automation of Nested Clade Phylogeographic Analysis. *Bioinformatics* **23**: 509–510.
- Papke RT, Ramsing NB, Bateson MM, Ward DM. (2003) Geographical isolation in hot spring cyanobacteria. *Environ Microbiol* **5**: 650–659.
- Pattengale ND, Alipour M, Bininda-Emonds ORP, Moret BME, Stamatakis A. (2010) How many bootstrap replicates are necessary? *J Comput Biol* **17**: 337–354.
- Pearson T, Giffard P, Beckstrom-Sternberg S, Auerbach R, Hornstra H, Tuanyok A, *et al.* (2009) Phylogeographic reconstruction of a bacterial species with high levels of lateral gene transfer. *BMC Biol* **7**: 78.
- Pommier T, Canback B, Lundberg P, Hagstrom A, Tunlid A. (2009) RAMI: a tool for identification and characterization of phylogenetic clusters in microbial communities. *Bioinformatics* **25**: 736–742.
- Posada D, Crandall KA, Templeton AR. (2000) GeoDis: A program for the cladistic nested analysis of the geographical distribution of genetic haplotypes. *Mol Ecol* **9**: 487–488.

Pritchard JK, Stephens M, Donnelly P. (2000) Inference of population structure using multilocus genotype data. *Genetics* **155**: 945–959.

Roberts MA and Crawford DL. (2000) Use of randomly amplified polymorphic DNA as a means of developing genus- and strain-specific *Streptomyces* DNA probes. *Appl Environ Microbiol* **66**: 2555-2564.

Rong X, Huang Y. (2010) Taxonomic evaluation of the *Streptomyces griseus* clade using multilocus sequence analysis and DNA-DNA hybridization, with proposal to combine 29 species and three subspecies as 11 genomic species. *Int J Syst Evol Microbiol* **60**: 696–703.

Rousk J, Bååth E, Brookes PC, Lauber CL, Lozupone C, Caporaso JG, *et al.* (2010) Soil bacterial and fungal communities across a pH gradient in an arable soil. *ISME J* **4**: 1340–1351.

Schliep KP. (2011) phangorn: phylogenetic analysis in R. *Bioinformatics* **27**: 592–593.

Schloss PD, Westcott SL, Ryabin T, Hall JR, Hartmann M, Hollister EB, *et al.* (2009) Introducing mothur: open-source, platform-independent, community-supported software for describing and comparing microbial communities. *Appl Environ Microbiol* **75**: 7537–7541.

Shimodaira H, Hasegawa M. (1999) Multiple comparisons of log-likelihoods with applications to phylogenetic inference. *Mol Biol Evol* **16**: 1114–1116.

707 Smouse PE, Long JC, Sokal RR. (1986) Multiple regression and correlation extensions of the  
708 Mantel test of matrix correspondence. *Syst Zool* **35**: 627–632.  
709

710 Soltis D, Gitzendanner M, Streng D, Soltis P. (1997) Chloroplast DNA intraspecific  
711 phylogeography of plants from the Pacific Northwest of North America. *Plant Syst Evol* **206**:  
712 353–373.  
713

714 Stamatakis A. (2006) RAxML-VI-HPC: maximum likelihood-based phylogenetic analyses with  
715 thousands of taxa and mixed models. *Bioinformatics* **22**: 2688–2690.  
716

717 Stevens RD. (2006) Historical processes enhance patterns of diversity along latitudinal gradients.  
718 *Proc R Soc B Biol Sci* **273**: 2283–2289.  
719

720 Sul WJ, Oliver TA, Ducklow HW, Amaral-zettler LA, Sogin ML. (2012) Marine bacteria exhibit  
721 a bipolar distribution. *Proc Natl Acad Sci U S A* **110**: 2342–2347.  
722

723 Swan BK, Tupper B, Sczyrba A, Lauro FM, Martinez-Garcia M, González JM, *et al.* (2013)  
724 Prevalent genome streamlining and latitudinal divergence of planktonic bacteria in the surface  
725 ocean. *Proc Natl Acad Sci U S A* **110**: 11463–11468.  
726

727 Takasuka TE, Book AJ, Lewin GR, Currie CR, Fox BG. (2013) Aerobic deconstruction of  
728 cellulosic biomass by an insect-associated *Streptomyces*. *Sci Rep* **3**: 1–10.  
729

730 Tavaré S. (1986) Some probabilistic and statistical problems in the analysis of DNA sequences.  
731 Am Math Soc Lect Math Life Sci **17**: 57–86.  
732  
733 Telford RJ, Vandvik V, Birks HJB. (2006) Dispersal limitations matter for microbial  
734 morphospecies. Science **312**: 1015.  
735  
736 Templeton AR, Boerwinkle E, Sing CF. (1987) A cladistic analysis of phenotypic associations  
737 with haplotypes inferred from restriction endonuclease mapping. i. basic theory and an analysis  
738 of alcohol dehydrogenase activity in *Drosophila*. Genetics **117**: 343–351.  
739  
740 Templeton AR, Routman E, Phillips CA. (1995) Separating population structure from population  
741 history: a cladistic analysis of the geographical distribution of mitochondrial DNA haplotypes in  
742 the tiger salamander, *Ambystoma tigrinum*. Genetics **140**: 767–782.  
743  
744 Vos M, Velicer GJ. (2008) Isolation by distance in the spore-forming soil bacterium  
745 *Myxococcus xanthus*. Curr Biol **18**: 386–391.  
746  
747 Wallace A. (1878) Tropical nature, and other essays. London: Macmillan and Co.  
748  
749 Watve M, Tickoo R, Jog M, Bhole B. (2001) How many antibiotics are produced by the genus  
750 *Streptomyces*? Arch Microbiol **176**: 386–390.  
751

Wawrik B, Kutliev D, Abdivasievna UA, Kukor JJ, Zylstra GJ, Kerkhof L. (2007) Biogeography of Actinomycete communities and type ii polyketide synthase genes in soils collected in New Jersey and Central Asia. *Appl Environ Microbiol* **73**: 2982–2989.

Welch RA, Burland V, Plunkett G, Redford P, Roesch P, Rasko D, *et al.* (2002) Extensive mosaic structure revealed by the complete genome sequence of uropathogenic *Escherichia coli*. *Proc Natl Acad Sci U S A* **99**: 17020–17024.

Whitaker RJ, Grogan DW, Taylor JW. (2003) Geographic barriers isolate endemic populations of hyperthermophilic archaea. *Science* **301**: 976–978.

Wiens JJ, Donoghue MJ. (2004) Historical biogeography, ecology and species richness. *Trends Ecol Evol* **19**: 639–644.

Williams D, Dunkerley D, DeDecker P, Kershaw P, Chappell M. (1998) Quaternary environments. London: Arnold.

Wilson AB, Veraguth IE. (2010) The impact of Pleistocene glaciation across the range of a widespread European coastal species. *Mol Ecol* **19**: 4535–53.

# Table and Figure Legends

**Table 1.** A total of 755 *Streptomyces* strains were isolated from 13 sites, and 308 of these strains were found to represent the six targeted phylogroups. The numbers of isolates per site that belonged to each of our target phylogroups is indicated. Isolate names begin with a letter code referring to the sample site.

| Site                   | Code | Latitude | Longitude | Altitude | Isolates/<br>Site | Isolates from <i>Streptomyces</i> sp.<br>phylogroup |            |            |           |           |     |
|------------------------|------|----------|-----------|----------|-------------------|-----------------------------------------------------|------------|------------|-----------|-----------|-----|
|                        |      |          |           |          |                   | MAN<br>125                                          | MAN<br>196 | WA<br>1063 | MS<br>200 | MS<br>152 | F34 |
| Manley Hot Springs, AK | man  | 63.87°N  | -149.02°W | 452 m    | 95                | 51                                                  | 26         | 1          |           |           |     |
| Denali Hwy, AK         | den  | 63.22°N  | -147.68°W | 894 m    | 40                | 40                                                  |            |            |           |           |     |
| Bothell, WA            | wa   | 47.73°N  | -122.24°W | 132 m    | 105               | 21                                                  | 5          | 21         |           |           |     |
| Astoria, OR            | or   | 46.18°N  | -123.85°W | 40 m     | 79                |                                                     | 8          | 7          |           |           |     |
| Kennebunk, ME          | me   | 43.4°N   | -70.54°W  | 28 m     | 85                |                                                     | 13         |            |           |           |     |
| Sun Prairie, WI        | sun  | 43.17°N  | -89.24°W  | 289 m    | 65                | 3                                                   |            |            | 3         |           |     |
| Brookfield, WI         | b    | 43.06°N  | -88.13°W  | 277 m    | 22                |                                                     |            | 5          |           |           |     |
| Palo Alto, CA          | st   | 37.43°N  | -122.17°W | 24 m     | 34                |                                                     |            |            |           | 2         | 1   |
| Greensboro, NC         | gb   | 36.09°N  | -79.89°W  | 276 m    | 9                 |                                                     | 1          |            |           | 2         |     |
| Troy (Uwharrie), NC    | uw   | 35.71°N  | -79.88°W  | 194 m    | 19                |                                                     | 4          |            | 7         |           |     |
| Starkville, MS         | ms   | 33.46°N  | -88.8°W   | 119 m    | 90                |                                                     |            |            | 11        | 8         | 2   |
| Austin, TX             | t    | 30.2°N   | -97.77°W  | 199 m    | 42                |                                                     |            |            |           |           | 6   |
| Fort Pierce, FL        | f    | 27.54°N  | -80.35°W  | 0 m      | 70                |                                                     |            |            | 7         | 5         | 48  |
| <b>Total</b>           |      |          |           |          | 755               | 115                                                 | 57         | 34         | 28        | 17        | 57  |

**Table 2.** MLSA was performed on a total of 17-47 strains from each phylogroup. Summary statistics for concatenated MLSA nucleotide sequences were determined as described in methods. Phylogroup average latitude (Ave Lat) was determined using the total number of isolates per phylogroup provided in Table 1. The standard index of association is zero for a population in linkage equilibrium.

| Phylogroup | Ave Lat | n  | Haplotypes | Min ANI | S  | $\pi$  | Tajima's D | $\theta_W$ | $\rho$  | $\rho/\theta_W$ | $I_A$ | $\Phi_W$    |
|------------|---------|----|------------|---------|----|--------|------------|------------|---------|-----------------|-------|-------------|
| MAN125     | 60.15°N | 45 | 25         | 99.5    | 23 | 0.0026 | 0.53       | 0.0023     | 0.0094  | 4.18            | 0.09  | 2.95E-01    |
| MAN196     | 52.84°N | 47 | 26         | 98.5    | 65 | 0.0075 | 0.67       | 0.0063     | 0.00043 | 0.068           | 0.49  | 4.24E-02*   |
| WA1063     | 47.20°N | 19 | 13         | 98.1    | 63 | 0.0052 | -1.35      | 0.0077     | 0       | 0               | 0.43  | 4.33E-03    |
| MS200      | 33.58°N | 27 | 21         | 98.4    | 93 | 0.0088 | -0.58      | 0.0103     | 0.0017  | 0.17            | 0.39  | 1.33E-03**  |
| MS152      | 32.50°N | 17 | 15         | 97.6    | 96 | 0.0107 | -0.51      | 0.012      | 0.0013  | 0.11            | 0.35  | 1.078E-01** |
| F34        | 28.20°N | 36 | 22         | 97.7    | 93 | 0.0109 | 0.52       | 0.0096     | 0.0011  | 0.11            | 0.46  | 1.79E-01**  |

Ave Lat: average latitude of phylogroup members

n: number of isolates subsampled for MLSA

Min ANI: minimum percent pairwise average nucleotide identity (ANI) within phylogroup members

S: segregating sites

$\pi$ : per site nucleotide diversity

$\theta_W$ : per site Watterson's theta ( $2N_e\mu$ )

$\rho$ : per site rate of recombination/gene conversion ( $2N_e r/2$ )

$\rho/\theta_W$ : relative rate of recombination to mutation

$I_A$ : standard index of association

$\Phi_W$ : pairwise homoplasy index (Phi) statistic with  $p$ -value < 0.05\*, 0.01\*\* under the null hypothesis of no recombination

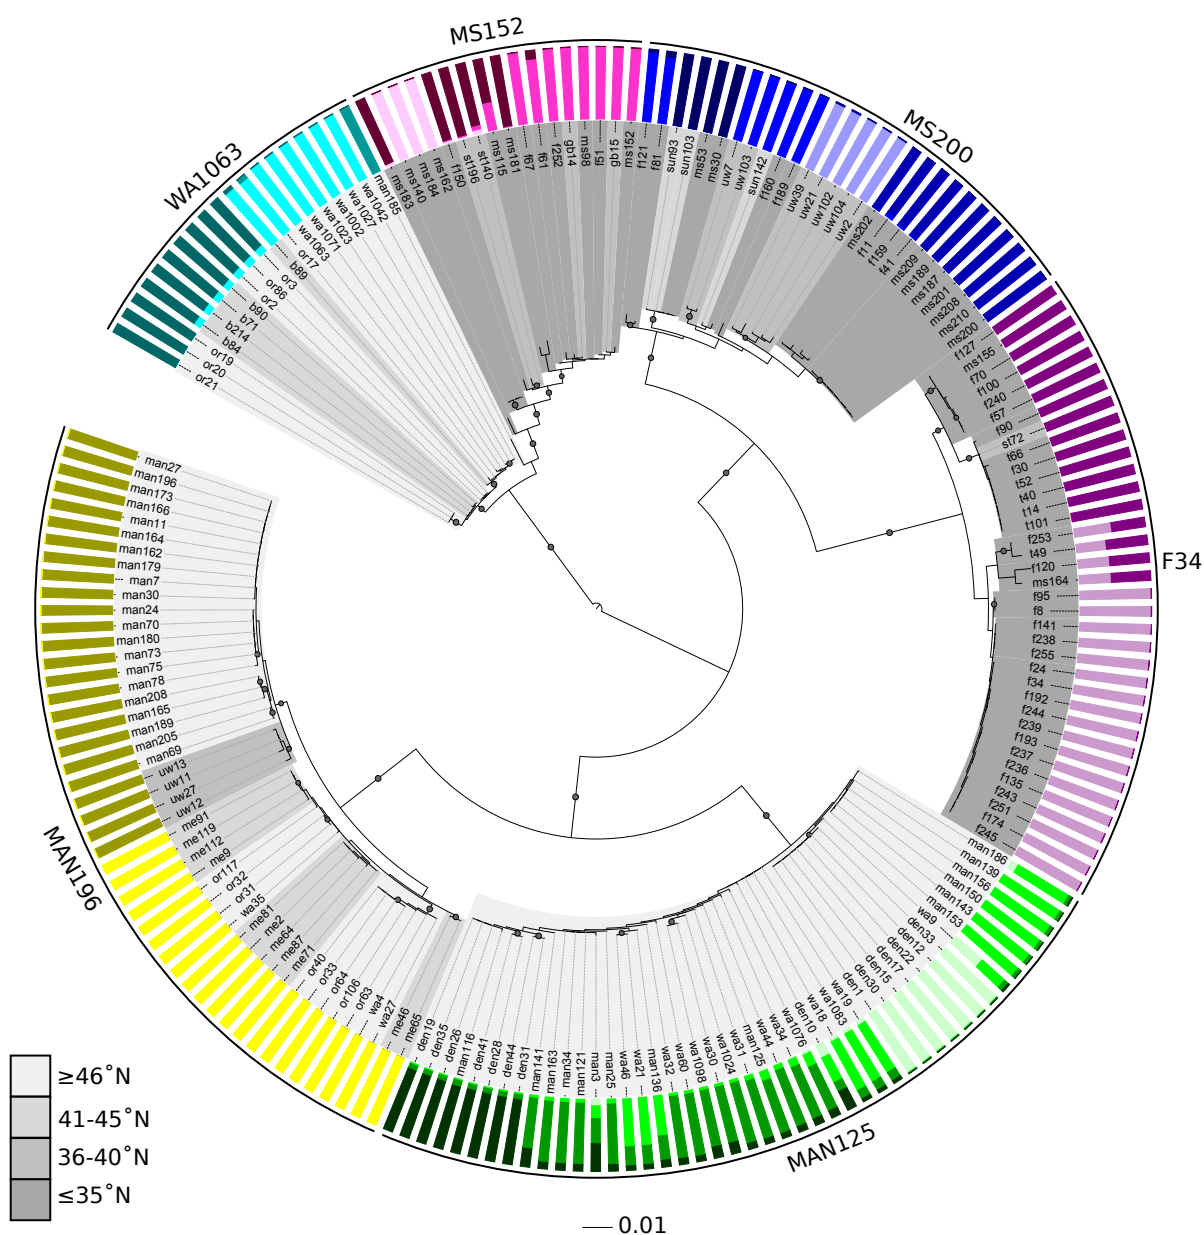

800  
801 **Figure 1.** Tree was constructed from concatenated MLSA loci nucleotide sequences using  
802 maximum likelihood with a GTRGAMMA evolution model. Scale bar represents nucleotide  
803 substitutions per site. The root was defined by *Mycobacterium smegmatis*. Nodes with bootstrap

confidences > 80 are indicated with gray circles, and precise bootstrap values are found in Figure S4A. The colored bars in the outer ring indicate genetic contributions from different ancestral populations as inferred by Structure analysis. The shading of the inner ring indicates the latitude from which each strain was isolated according to the scale provided. The isolation site for each strain can be determined by isolate names as indicated in Table 1.

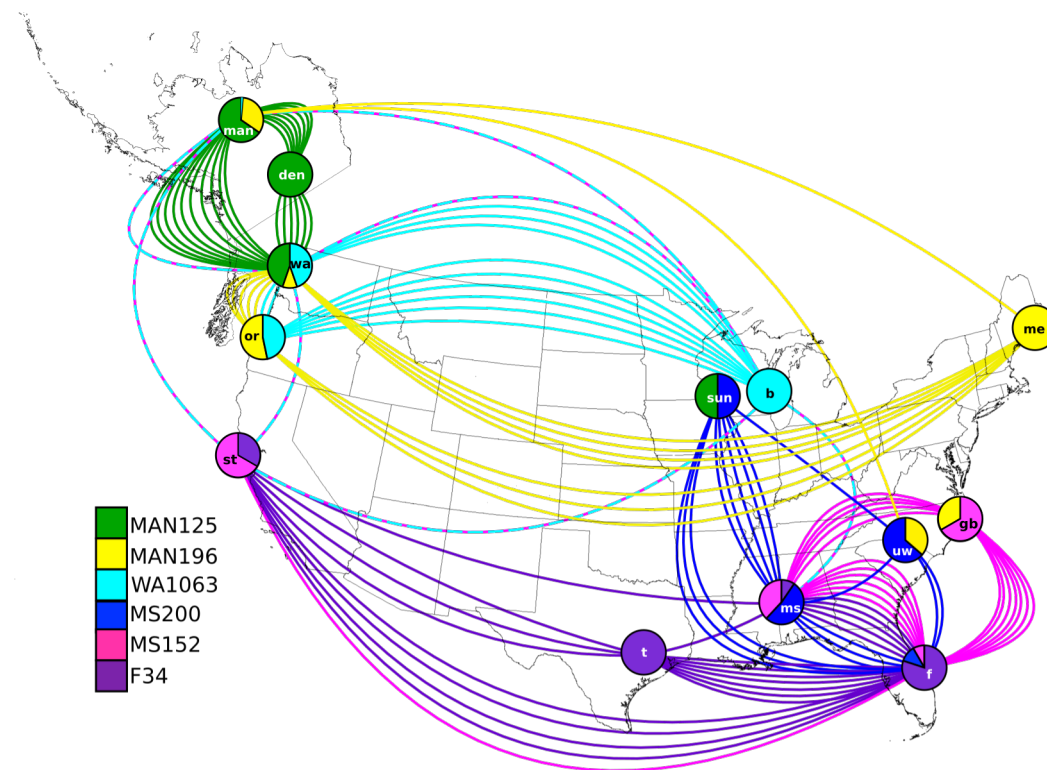

**Figure 2.** Circles depict sample sites and are labeled according to site code (Table 1). The relative abundance of each phylogroup at each site is indicated by color according to the legend, with raw counts provided in Table 1. Solid colored lines represent identical alleles shared by phylogroup members subsampled for MLSA across sites. Dashed multicolored lines depict identical *atpD* alleles shared by strains in phylogroups WA1063 and MS152 (Figure S4B).

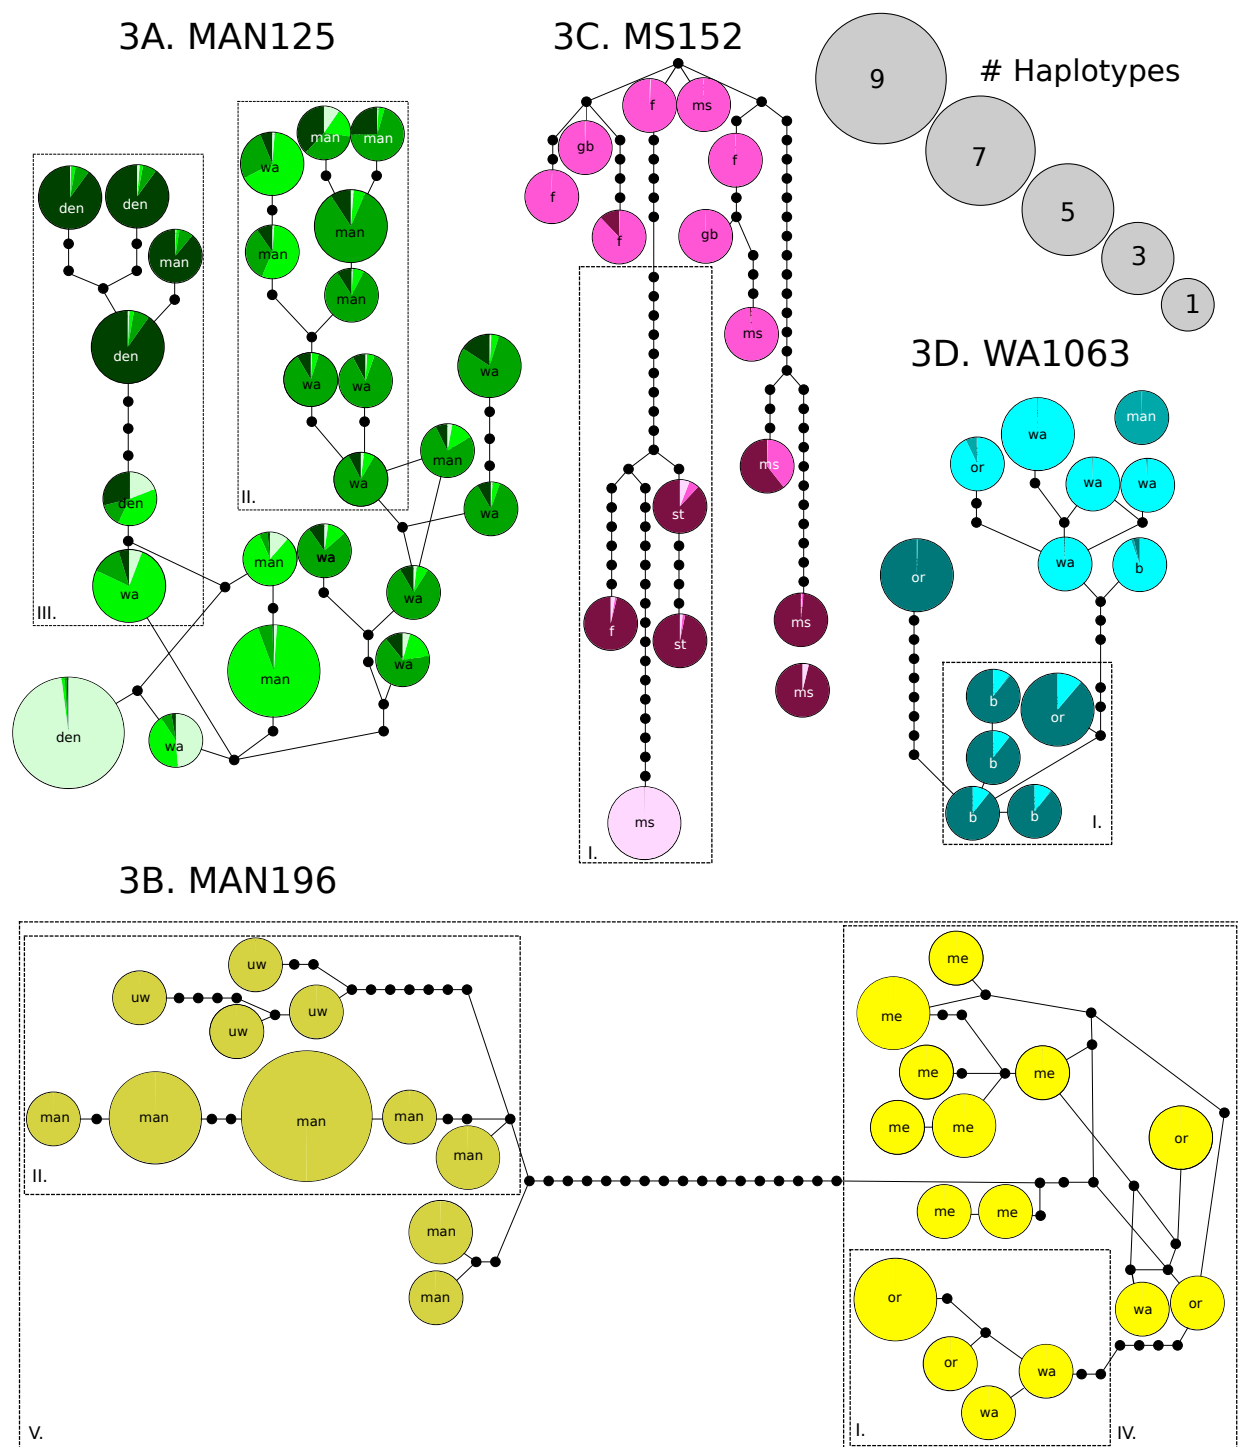

**Figure 3.** Haplotype networks for phylogroups MAN125 (3A), MAN196 (3B), MS152 (3C), WA1063 (3D). Circles represent unique MLSA haplotypes whose radius is proportional to the number of isolates sharing that haplotype, and colors correspond to strain ancestry and

subpopulation affiliation as determined by Structure analysis and defined in Figure 1. Haplotypes are labeled with a letter code referring to sample site location as indicated in Table 1. Black circles represent un-sampled, inferred haplotypes with each circle designating a single nucleotide polymorphism. The length of edges between nodes is uninformative. Dashed rectangles encompass clades that have significant phylogeographic inferences from nested clade analysis, as described in methods. Roman numerals correspond to the following inferences: I. Allopatric fragmentation; II. Long distance colonization and/or past fragmentation; III. Restricted gene flow with isolation by distance; IV. Restricted gene flow but with some long-distance gene flow over intermediate ranges not occupied by the species; or past gene flow followed by extinction of intermediate populations; V. Contiguous range expansion.

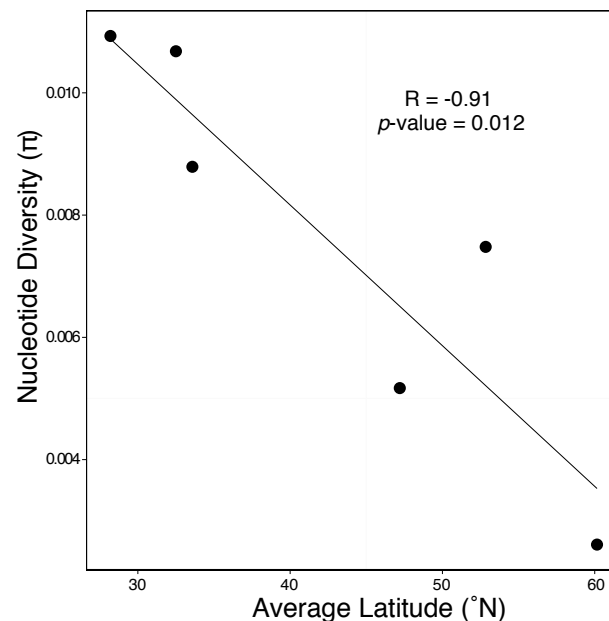

**Figure 4.** Average latitude was determined using a weighted average based on the total number of isolates per site as indicated in Table 1. Nucleotide diversity was calculated using concatenated MLSA loci and is expressed per site.
